# Supplementary figures and images for: Lactobacillus plantarum AR495 improves colonic transport hyperactivity in irritable bowel syndrome through tryptophan metabolism
Source: Royal Society of Chemistry journal article supplement (doi:10.1039/d4fo01087f), 2024-01-01

Original WB film and its imaging image

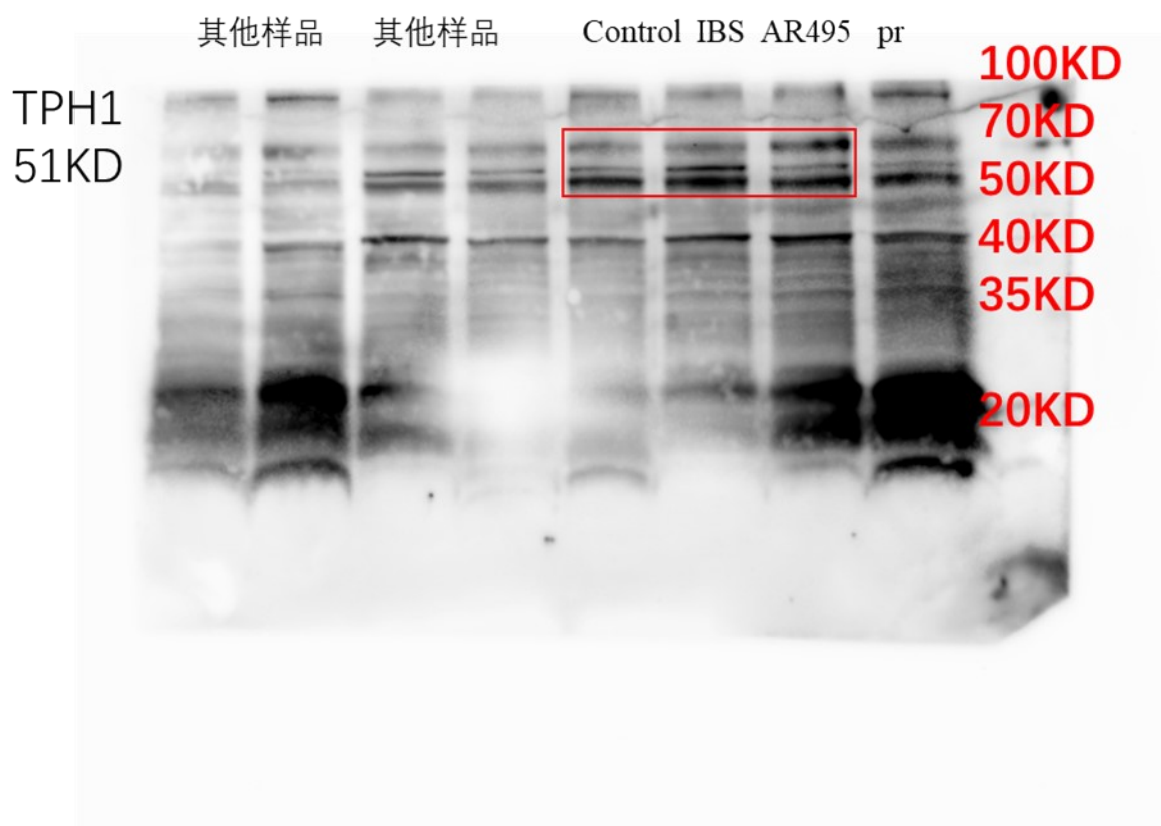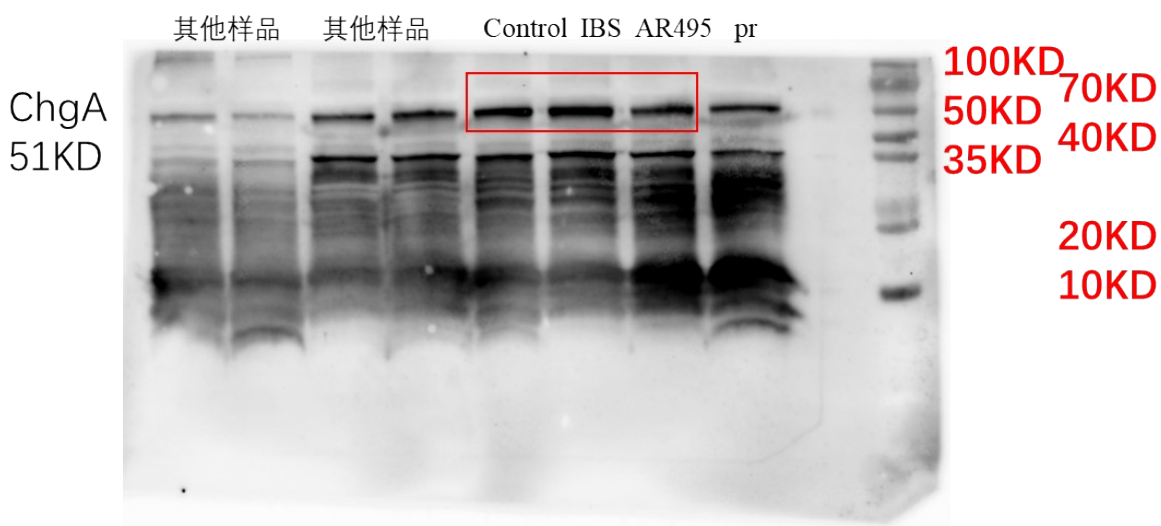

SERT

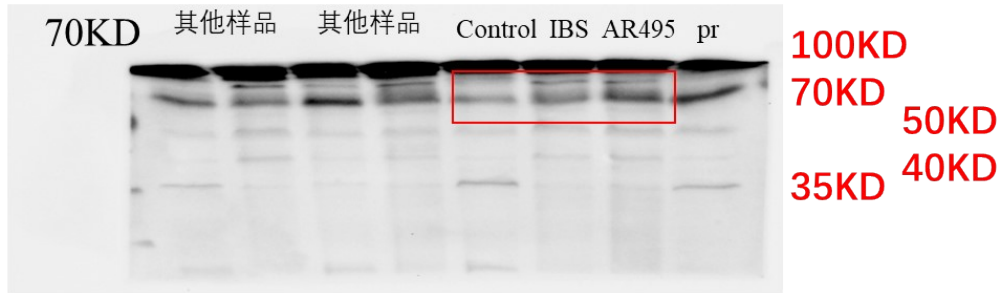

$\beta$ -actin

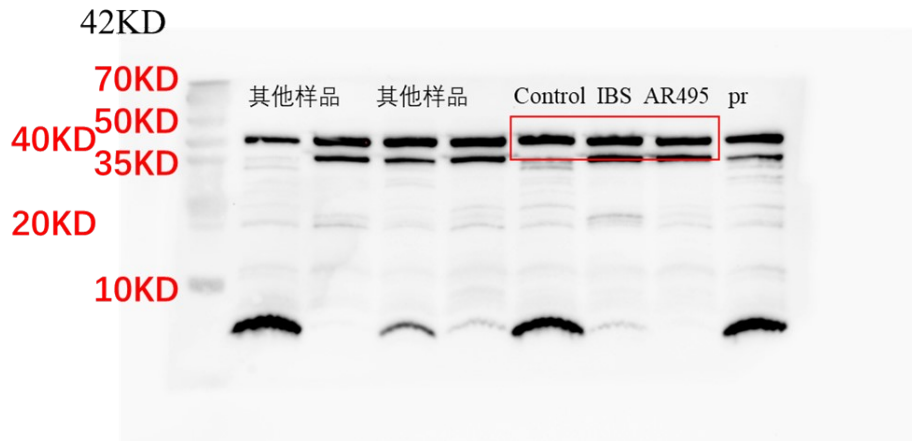

Supplement: d4fo01087f1.pdf [file d4fo01087f1.pdf]
